# Supplementary material for: Controlled Release of Acetyl Salicylic Acid in Intelligent Hydrogel Based on Cross-linked O-Carboxymethyl Chitosan
Source: Research Square preprint supplement (doi:10.21203/rs.3.rs-312464/v1), 2021-03-18
Supplement: Supplementary file 1 [file dc703125c65de8c271893080.docx]

**Table 1:** The prepared conditions and structural parameters of O-CMCS

| **Sample name** | **Reaction conditions** | **DD（%）** | **DS（%）** |
| --- | --- | --- | --- |
| F2 | 34 wt.% of NaOH, 60℃, 2 h | 51 | 129 |
| F3 | 23 wt.% of NaOH, 60℃, 3 h | 63 | 117 |
| F4 | 36 wt.% of NaOH, 80℃, 4 h | 71 | 114 |
| F5 | 36 wt.% of NaOH, 80℃, 6 h | 80 | 123 |

**Table 2:** Different drug release models fitted to the drug release kinetics of the drug-loading particle prepared from F2 in the simulated intestinal juice

| Models | Model expressions and model fitting results | R2 | Drug release mechanisms |
| --- | --- | --- | --- |
| Zero-order |  | -0.15 | Constant-rate release |
|  |
| Higuchi |  | 0.69 | Fickian diffusion |
|  |
| Logistic |  | 0.99 | S-type release |
|  |
| Weibull |  | 0.99 | S-type release |
|  |
